# Supplementary material for: Unique ocean circulation pathways reshape the Indian Ocean oxygen minimum zone with warming
Source: Copernicus journal article supplement (doi:10.5194/egusphere-2023-1082), 2023-05-25
Supplement: Supplementary file [file egusphere-2023-1082-AC1-supplement.pdf]

# General Response

We thank the three reviewers for their constructive and insightful comments. The main concerns among the reviewers fall into 3 categories. We give a brief overview of how we propose to address them and include the proposed new figures here in the general response, and then provide a detailed response below.

## 1. **Role of changes in stratification and productivity in dissolved oxygen projections.**

The reviewers ask for an expanded investigation of potential changes in upper ocean stratification and the biological sink on oxygen changes. Specifically, increased stratification could contribute to deoxygenation in the northern Arabian Sea, and decreased productivity and respiration rates could contribute to oxygenation in the South Equatorial Current (SEC). We propose to add a subsection to our *Results* in which we examine trends in upper ocean stratification (Figure GAC1) and the export of organic carbon at 100 m (Figure GAC2). Both the northern Arabian Sea and SEC regions are projected to experience increases in stratification between 100 - 200 m, as well as decreases in export at 100 m, with opposing effects on oxygen. The spatial correlation of these two trend fields is expected, given the relationship between stratification and nutrient supply via vertical mixing. This suggests that the effects of stratification and export trends, at least, partially compensate each other in both of these regions. We propose to discuss this compensation and how it is consistent with the results of our sections 3.5 and 3.6 (using Optimum Multiparameter (OMP) analysis) which suggests that changes in circulation and water mass fractions related to lateral advective pathways can explain nearly all simulated oxygen changes (direct calculations of mixing-driven oxygen changes will be added in the revised manuscript; Figure GAC3). We have also performed additional sensitivity tests with the OMP method (see new Figure GAC3 and new Method details at end of general response) and propose to add a discussion of the robustness and limitation of the OMP method, and the implications for our results (to be added to *Discussion* section 4.4).

## 2. **Clarification of approach.**

One reviewer is concerned with the definition of Oxygen Minimum Zone (OMZ) used in the manuscript which is a continuum covering a broad range of oxygen values extending beyond the commonly used hypoxic thresholds (e.g., 60  $\mu\text{mol/kg}$ ). We propose to clarify in the *Methods* section 2.2.1 and throughout the text the rationale for using this broad definition: (1) The relevant thresholds for 'low oxygen' environments can vary significantly depending on the application, such as (in order of increasing threshold) denitrification, mortality of marine organisms, and sublethal stresses on marine organisms. Specifically, thresholds of  $\sim 150 \mu\text{mol/kg}$  (and even as high as  $200 \mu\text{mol/kg}$ ) are commonly used as habitat boundaries for large commercial fish species (eg Vaquer-Sunyer and Duarte, 2008); (2) Using a broad continuum of OMZ thresholds enables us to interpret changes in oxygen volume (including the hypoxic volume) within the context of larger-scale forced changes (contraction, redistribution, expansion).

## 3. **Robustness of findings across individual Earth System Models (ESM).**

The reviewers note that much of the analysis presented in the manuscript is based on the presentation of Multi-Model Means (MMM) of the ESM ensemble, which may mask

compensating biases and different dynamical responses across models and may be sensitive to model selection. We propose to a) expand the discussion of the maps/sections of individual ESMs already included in the Supplementary Information (SI) of the original manuscript, b) add individual ESMs when presenting OMZ volume and OMZ volume trends in the main text (new Figures GAC4, GAC5, GAC6), and c) compare the effects of water mass fraction changes (from OMP analysis) across individual models (Figure GAC3). Overall, we find that most models exhibit the same regional pattern of oxygen trends and regimes of OMZ volume trends as the MMM, with varying amplitudes of features across models. This will also be discussed in Discussion section 4.4.

We are confident that these revisions will address the concerns of the reviewers. Below, we provide specific details and figures for these revisions, and we address additional reviewer comments.

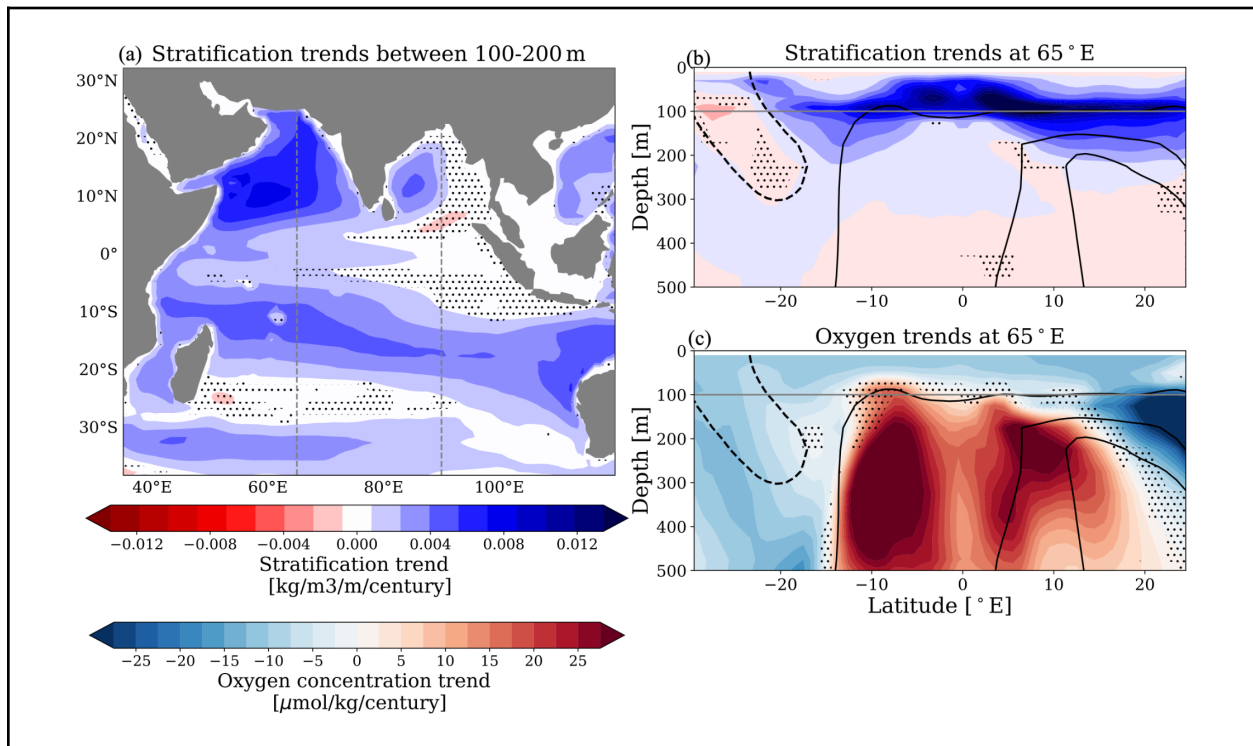

Figure GAC (General Author Comment) 1: Multi-model mean (MMM) stratification trends under SSP5-8.5 scenario forcing (1915-2100). Stratification trends (a) between 100 and 200m, and (b) at 65E. (c) dissolved oxygen trends at 65E. (b,c) Solid black contours represent 20, 60 and 150  $\mu\text{mol/kg}$  oxygen. Dashed black contours highlight salinity signature of Subtropical Underwater (STUW). Results are stippled where less than 75% (6/8) of models agree on sign of trend.

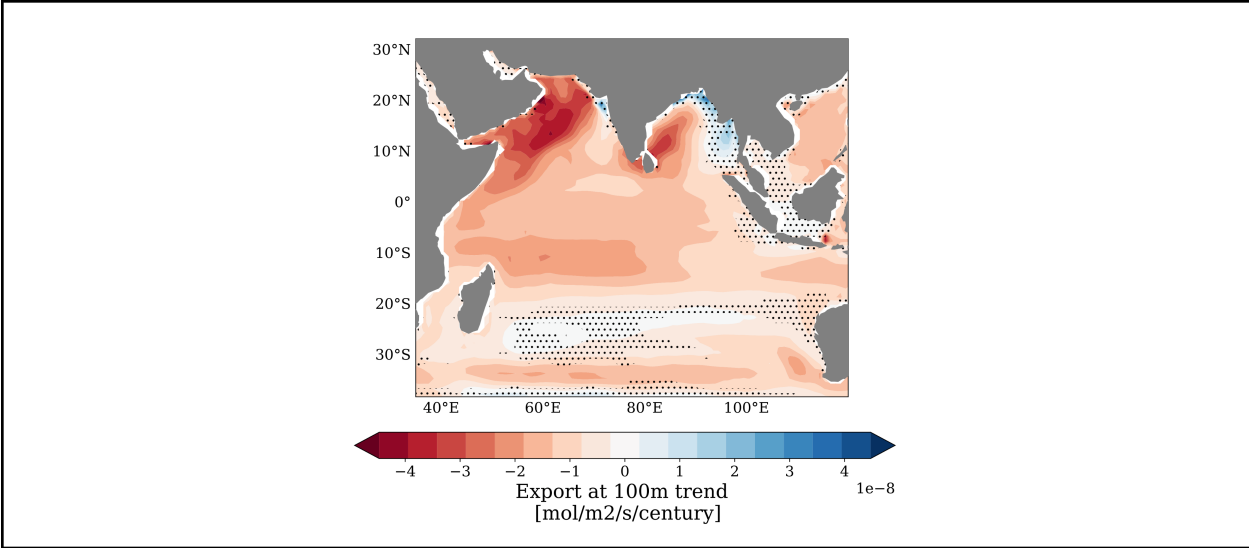

Figure GAC2: Multi-model mean (MMM) export of organic carbon at 100 m trends under SSP5-8.5 scenario forcing (1915-2100). Results are stippled where less than 75% (6/7) of models agree on sign of trend.

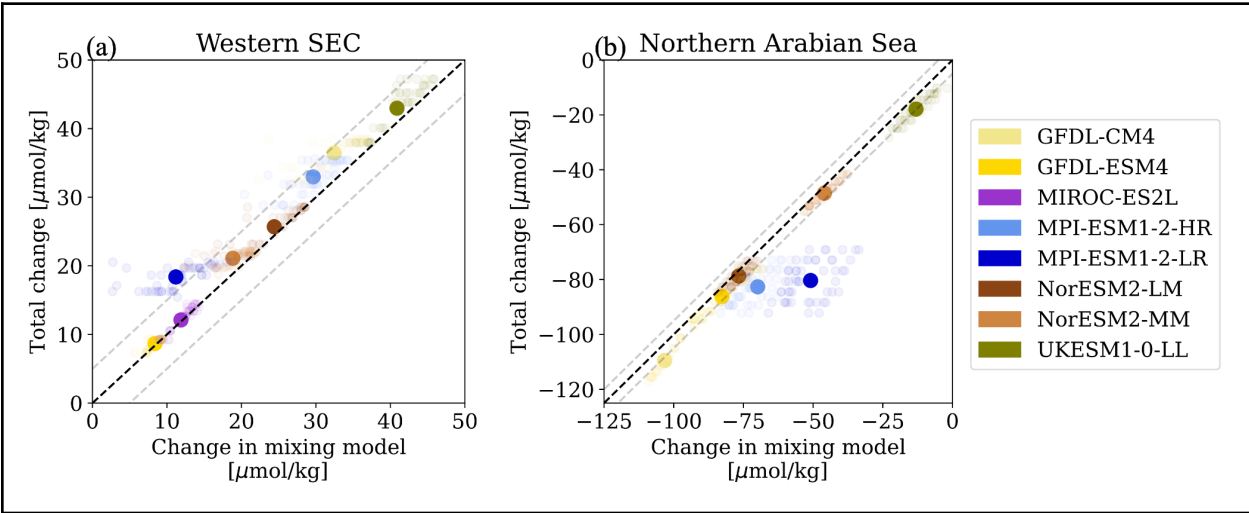

Figure GAC3: Changes in dissolved oxygen accounted for by mixing model analysis. Total oxygen changes (simulated by ESMs) versus oxygen changes attributed to shifts in water mass composition in the OMP mixing mode for the (a) western South Equatorial Current (SEC) and (b) northern Arabian Sea. Results in the western SEC averaged between 40-80E, 5-15S. Results in the northern Arabian Sea averaged between 62-70E, 20-26N. Solid markers are the mean of 50 runs (light markers) of the OMP analysis with perturbed source water properties (See end of general response for details on new methods). Black dashed line marks 1-to-1 relationship, gray dashed lines mark 5  $\mu\text{mol/kg}$  deviations from 1-to-1.

**New method to be added to Optimum Multiparameter (OMP, section 2.2.4) analysis for sensitivity analysis and used to produce Figure GAC3 above:**

“From the mixing model results, we quantify the change in oxygen accounted for by shifts in water mass composition for key regions:  $\Delta O_{mixing} = \sum_i (f_{i,1} O_{i,1} - f_{i,0} O_{i,0})$ , where  $f_i$  and  $O_i$  are the fraction and oxygen concentration of source water type  $i$ , for future (1) and historical (0) states. Oxygen is allowed to be remineralized, so  $\Delta O_{mixing}$  need not approximate the total simulated change in oxygen. To test the sensitivity of the mixing model results to small changes in the definition of source water types and potential density layer, we average 50 realizations of the experiment applying random perturbations to source water locations and density values. Source water locations are perturbed by up to 5 degrees in latitude and longitude for the South Equatorial Current region and 2 degrees for the Arabian Sea. For both locations, the value of the potential density layer is perturbed by up to 0.1.”

We note regarding the OMP analysis that we lowered the weight on oxygen in the optimization compared to the submitted manuscript (lowered from 20% the weight of temperature and salinity to 2%) to more appropriately account for the range of oxygen values in the analysis compared to the range and temperature and salinities (see Appendix A of submitted manuscript for technical details of OMP).

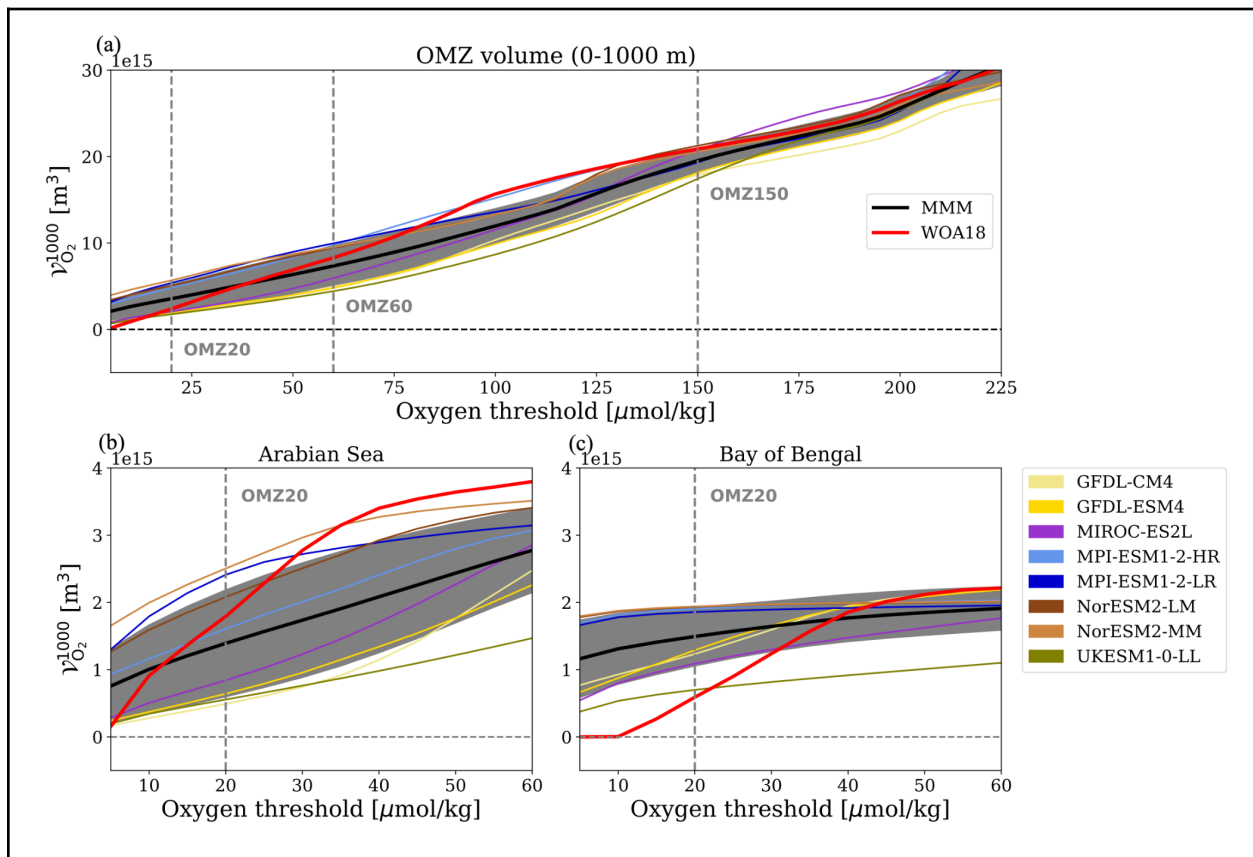

Figure GAC4: (To replace Figure 2 in main text) OMZ volume taken between 0-1000 m in the (a) Indian Ocean and sub-basins (b) Arabian Sea and (c) Bay of Bengal for the multi-model mean averaged over 1950-2015 (MMM; black) and observed climatology (WOA18; red). Shading represents one standard deviation of the model spread. Individual ESMS shown in colored curves. Southern boundary of Arabian Sea and Bay of Bengal are at 5N.

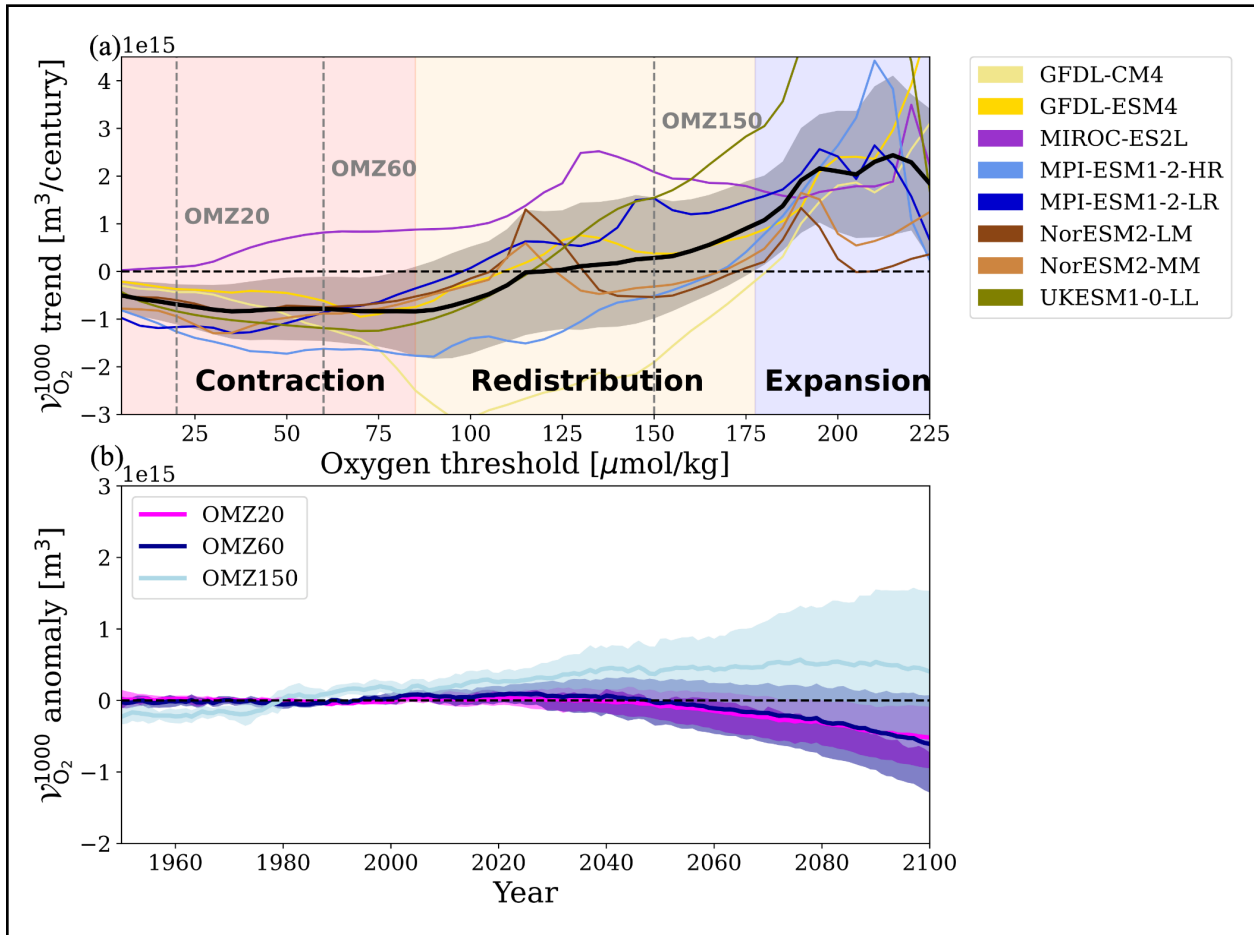

Figure GAC5: (To replace Figure 3 in main text) Multi-model mean thermocline OMZ volume changes (between 0 - 1000 m) under SSP5-8.5 scenario forcing (2015-2100). (a)  $V_{O_2}^{1000}$  trends as a function of oxygen threshold for the Indian Ocean. The 20, 60 and 150  $\mu mol/kg$  thresholds bounding OMZ20, OMZ60 and OMZ150 are indicated with grey dashed lines. (b) Time series of  $V_{O_2}^{1000}$  anomaly from 1950-2100 (anomaly referenced to 1950-2015 mean) for OMZ60 (dark blue) and OMZ150 (teal). Shading represents one standard deviation of model spread.

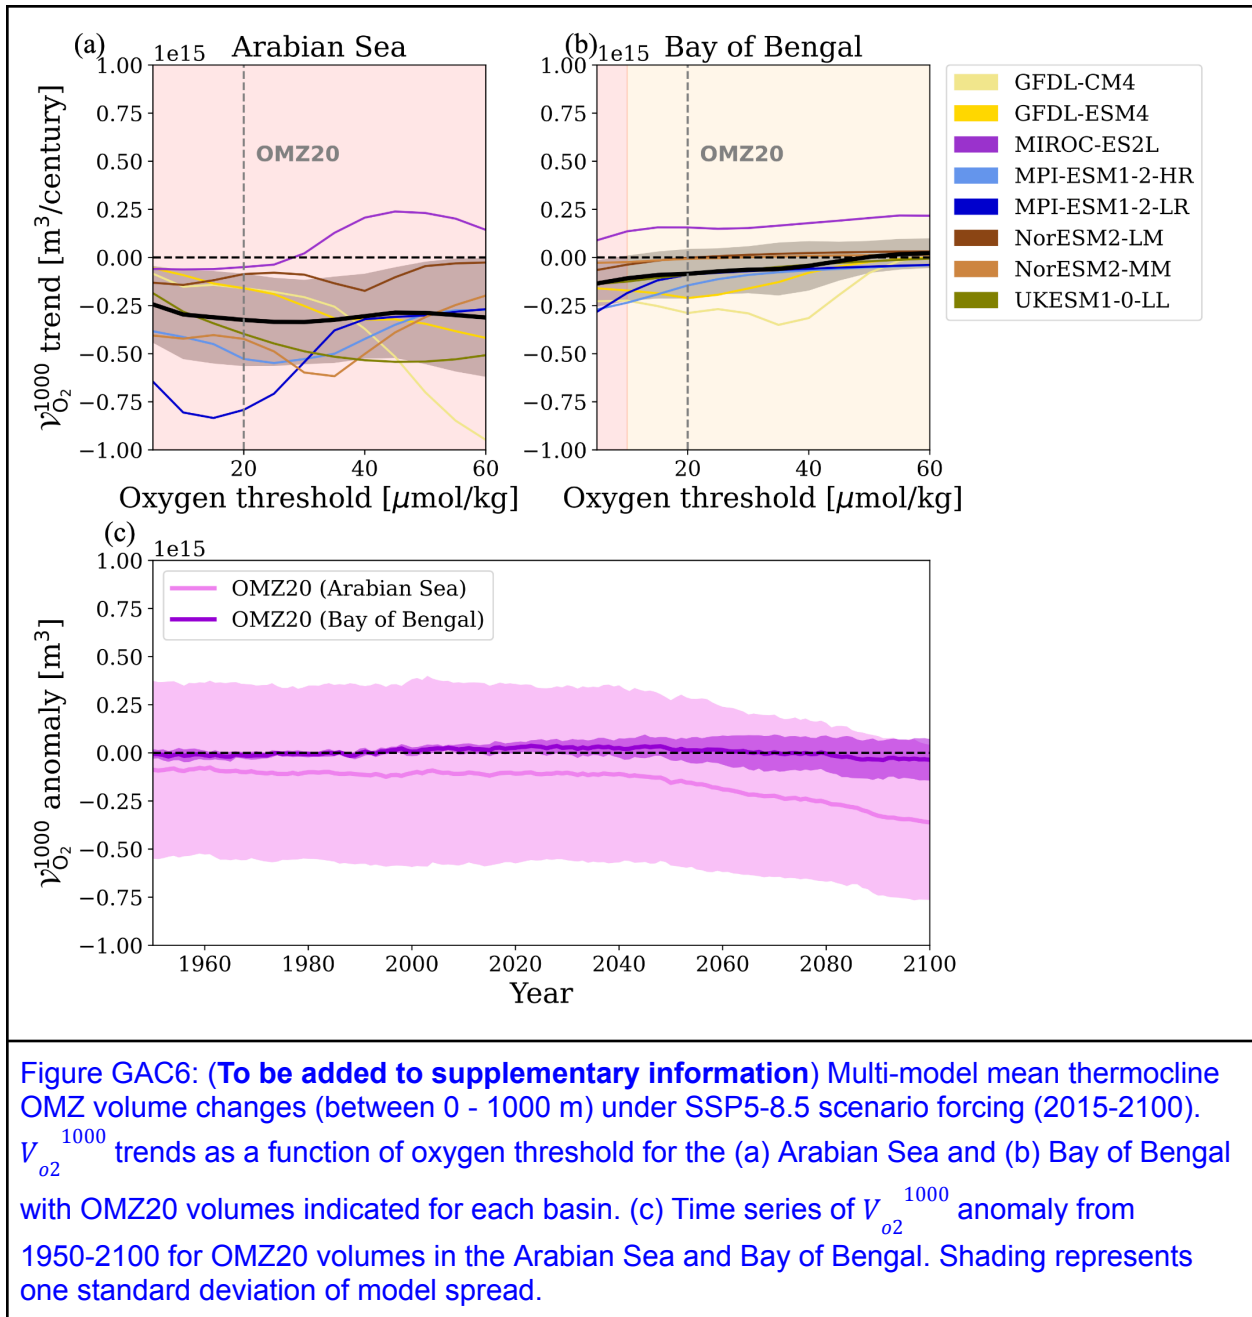

## Reviewer 1:

The paper by Ditkovsky et al. investigates the response of the Indian Ocean OMZ to future climate change. To this end, authors analyze an ensemble of Earth system model high-emissions scenario simulations from the Coupled Model Intercomparison Project phase 6 (CMIP6). They show that the Indian Ocean experiences a broad oxygenation in the western tropical region driven by a decrease in waters supplied by the Indonesian Throughflow in favor of waters supplied from the south, typically richer in oxygen. This results in a prominent contraction of the OMZ there. However, the warming of the marginal seas, particularly that of the Persian Gulf, is suggested to cause a localized deoxygenation in the northern Arabian Sea, leading the OMZ to expand there.

### General comments:

I enjoyed reading this manuscript that I found generally well structured and well written. The question of future changes in OMZs in general and in the Indian Ocean in particular is critical and of very high relevance to the community, as the previously reported trends remain unclear and tainted with important uncertainties. The authors did an excellent job at summarizing and analyzing the O<sub>2</sub> changes simulated by the CMIP6 models in the Indian Ocean for different classes of O<sub>2</sub>. However, I have a few concerns relative to the presentation and the interpretation of the results that need to be addressed before the manuscript can be accepted for publication.

- 1) My main concern is that when it comes to explaining the projected changes in O<sub>2</sub>, the authors did not explore all possible factors and focused nearly exclusively on the changes in water mixing ratios. While I believe that this likely plays a critical role in the transport and redistribution of O<sub>2</sub> as suggested by the authors, other mechanisms that could also play a role were not considered. This includes for instance: 1) the changes (reduction) in biological export and respiration, 2) changes in winter stratification and convection (that could potentially be important in the deoxygenation signal that emerges in the northern Arabian Sea, alongside the effect of marginal seas warming).

(Response R1C1) We agree that the role of biological export and stratification changes should be addressed. We propose to add a subsection to our *Results* that will present the following points:

The mixing model experiments suggest that nearly all of the simulated oxygen changes in the SEC and northern Arabian Sea can be accounted for by shifts in water mass compositions driven by changes in advective ventilation pathways (Fig. GAC3). Oxygen changes captured by the mixing model generally agree within about 5  $\mu\text{mol/kg}$  of the total simulated oxygen change for most models (with the exception of the MPI models), and this result is robust to small changes in the definitions of source water



mass types (Fig. GAC3 presents a composite of 50 runs with perturbed source water properties; see new methods for OMP). The residual oxygen changes that the mixing model does not capture, while small, tend to be systematically biased positive for the western SEC and negative for the northern Arabian Sea. This suggests the influence of additional processes not accounted for in the mixing model. These processes include increases in subsurface stratification which can influence the vertical mixing between different water masses and changes in biological oxygen consumption after a water parcel leaves its source water region. We examine trends in stratification under SSP5-8.5 forcing (Figure GAC1). Strong stratification increases are generally confined to the upper 100 m of the water column. However, in both the Arabian Sea and SEC regions, the multi-model mean simulates significant stratification increases between 100-200 m. These stratification increases are simulated consistently across the ESM ensemble for both regions (*Individual model stratification trends in supplementary*). Across the ensemble, most of the oxygenation in the SEC region occurs below 200 m, where stratification does not show strong changes, suggesting that changes in vertical mixing likely play a relatively minor role in this region. In contrast, most of the deoxygenation in the northern Arabian Sea is collocated with a stratification increase between 100-200 m, suggesting that reduced vertical mixing of oxygenated surface waters downward contributes to the deoxygenation simulated in this region.

Increased subsurface stratification tends to limit the vertical mixing of oxygenated surface waters downward, but also limits the mixing of subsurface nutrients into the surface. This in turn limits primary productivity and the export of organic matter to the subsurface, setting a control on oxygen consumption rates at depth. We examine trends in the export of organic carbon at 100 m (available for 7 out of 8 ESMs; Figure GAC2). The export of organic carbon consistently declines under SSP5-8.5 forcing over the Indian Ocean in the multi-model mean, with local maximum declines in the western SEC and Arabian Sea regions. Declines in export are particularly strong in the Arabian Sea in 4 of 7 ESMs (MIROC-ES2L, MPI-ESM1-2-HR, MPI-ESM1-2-LR, UKESM1-0-LL) and in the western SEC in 2 of 7 models (MIROC-ES2L, UKESM1-0-LL; *Individual model export trends in supplementary*). The Arabian Sea and SEC experience both a significant decline in export rates and increased stratification at depth with opposing effects on oxygen changes, and thus are perturbed by processes not captured by the mixing model. The signs of residual oxygen changes not fit by the mixing model (Fig. GAC3) suggest that decline in export dominates over stratification increases in the SEC, and vice versa in the northern Arabian Sea. Though compensation between the effects of export and stratification changes may be key to allowing the mixing model to perform well in both regions. While the mixing model results plausibly show that the pattern of oxygen trends simulated by our ESM ensemble can be driven by changes in advective ventilation pathways, a quantitative decomposition of contributions from advective ventilation, biological sink and stratification changes is not possible with available data.



We also add related points in discussion section 4.4 addressing limitations of our approach, particularly in the Arabian Sea:

There are also aspects of the Arabian Sea which may limit the accuracy of the mixing model (Optimum Multiparameter; OMP) analysis employed in this study. Specifically, it may be difficult to distinguish the contribution of Persian Gulf Water compared to Arabian Sea surface water because both tend to be anomalously warm, saline and well oxygenated. Thus, it is possible that weakened vertical exchange with the surface is aliased as a decrease in Persian Gulf Water fraction. The presence of Northern Arabian Sea deoxygenation in MIROC-ES2L, an ESM which does not resolve the marginal seas and was thus excluded from the OMP analysis for the region, also suggests that stratification increases may play a first-order role in Northern Arabian Sea deoxygenation in the ESM ensemble. A previous study by Lachkar et al. (2021), which investigates deoxygenation in the Arabian Sea from 1982 to 2010 using a high-resolution regional ocean model, attributes about 75% of ventilation decreases over this period to vertical mixing changes and only 25% to advective changes.

- 2) My second concern is that most of the analysis is focused on the presentation of multi-model means (MMM). While this is useful to derive average patterns among models, it masks out the behavior of individual models and hides important differences that can be useful to document and understand. For instance, do models that represent complex biogeochemical feedbacks behave differently from those that don't when it comes to future O<sub>2</sub> changes? Are there models where the oxygenation/deoxygenation patterns (or the drivers of those changes) are qualitatively different from the MMM despite having a decent representation of present-day O<sub>2</sub> conditions in the Indian Ocean? And if so, why? It would be interesting to explore individual model responses in addition to the MMM to gain a broader understanding of the uncertainties around projections. The individual models can be shown in the main paper (for example for curve plots) or in the supplementary information (for maps or vertical sections) and discussed in the main paper.

(Response R1C2) This point refers to our General Response point 3 above. In the submitted manuscript, we used stippling over the MMM to highlight where individual models agree and disagree, and included maps and sections of individual models in Supplementary Information (Figures S1, S2, S6 and S7, submitted manuscript). Yet, we understand that adding information and discussion about individual models is useful to the reader. First, we propose to extend the discussion comparing the pattern of oxygen trends across ESMs in section 3.3, based on Figure S7, leveraging comparisons within ESM "families":

“All three features of dissolved oxygen trends are captured in all individual ESMs in the ensemble (Fig. S6,S7), leading to a robust pattern in the multi-model mean (more than 75% of models agree on sign of trend; Fig. 3). However, there are some notable differences in the amplitude and extent of simulated oxygen trend features across the ensemble. We can leverage comparisons between related models to illustrate the sensitivity of the oxygen response amplitude to the model representations (e.g. resolution and biogeochemical complexity). For example, GFDL-CM4 and GFDL-ESM4 have the same dynamical ocean model but differ in both oceanic and atmospheric resolution (GFDL-CM4 has higher resolution) and biogeochemical components (GFDL-ESM4 has more complex representation of biogeochemistry). Despite very similar historical representations of oxygen in the Indian Ocean, we find that GFDL-CM4 and GFDL-ESM4 simulate different strengths of oxygenation in the SEC (Feature 2) and deoxygenation in the Arabian Sea (Feature 3), with GFDL-CM4 projecting more pronounced features in both regions. Meanwhile, NorESM2-LM and NorESM2-MM, which differ only in the horizontal resolution of their atmospheric components, project similar trends for oxygenation in the SEC but differ for deoxygenation in the Arabian Sea, with weaker deoxygenation simulated in the higher resolution version (NorESM2-MM). The influence of model biogeochemical complexity is also demonstrated by CanESM5 and CanESM5-CanOE, both of which were removed from our multi-model mean due to the absence of suboxia but we use them here to illustrate the sensitivity to the model set up. CanESM5 and CanESM5-CanOE, which only differ in the complexity of their in biogeochemical model, project different strengths for both Features 2 and 3, with CanESM5-CanOE (more complex representation of biogeochemistry) projecting weaker oxygenation in the SEC and stronger deoxygenation in the Arabian Sea. These results show that the sign of oxygen change is robust across the ensemble, but that both resolution and complexity of biogeochemistry influence the amplitude of the change.”

We also propose to add individual model curves to Figures 2 and 3 (OMZ volume and OMZ volume trends versus oxygen threshold; Figures GAC4,5,6). For Figure GAC5 in particular, we see that 7 of 8 ESMs simulate contraction for hypoxic thresholds and lower ( $\sim 0-60 \mu\text{mol/kg}$ ), and the model spread is coming primarily from a single model which does not simulate contraction (MIROC-ES2L).

- 3) Finally, OMZs are traditionally connected to hypoxia but some thresholds used in this study to characterize the OMZ (e.g.  $150 \text{ mmol/m}^3$ ) are much higher than the values typically used to define the OMZs of the Indian Ocean. As a result, regions that are far from the Arabian Sea and Bay of Bengal are also considered a part of the OMZ (e.g., the equatorial Indian Ocean and regions as south as 20S in the eastern Indian Ocean). Furthermore, some of the analyses (Figs 2, 3, 11) refer to the OMZ volume but show O<sub>2</sub>

concentrations as high as 225 mmol/m<sup>3</sup>. I suggest rephrasing the presentation to make it clearer that O<sub>2</sub> changes in the entire upper ocean are analyzed and not just the OMZ.

(Response R1C3) We understand the reviewer's perspective and this is a point the coauthors discussed when writing the manuscript. The "OMZ volume" is a familiar metric to the Biogeosciences readership, which implies a volume of water below a defined O<sub>2</sub> threshold. In contrast, a more general term such as "ocean volume" or "cumulative ocean volume" may be less intuitive. As mentioned in our General Response point 2, definitions of low-oxygen environments are highly dependent on the system of interest, e.g., many macroorganisms experience sublethal threats at oxygen levels of 150 μmol/kg including most tunas found in the Indian Ocean (eg Dueri 2017; see lines 133-138 in submitted manuscript). In addition, we believe that the terms OMZ20, OMZ60, and OMZ150 used in the text guide the readers and avoid confusion as they clearly state the oxygen threshold. To address the reviewer's concern, we propose to further clarify in methods that the highest thresholds presented are not generally used to define the boundary of the OMZ at the end of section 2.2.1: "We note that oxygen thresholds above 150 μmol/kg are not generally used to delimit low oxygen environments and OMZs, but we present them here to provide a holistic view of forced changes in oxygen distribution."

### **Specific comments:**

Lines 92-101 (model selection): The figures in the Supp Info provide a visual evaluation with a horizontal map and a vertical section in the AS. A more quantitative approach that considers for instance the volumes of key O<sub>2</sub> classes (e.g. below 20, or 60) would provide a more objective basis to retain or reject models. For instance, the UKESM model may not necessarily be better at simulating the OMZ (very thin and shallow) relative to the CNRM model (that was excluded). A related question is how sensitive the results are to this model selection. More generally, I think using multi-model means (MMM) can mask out systematic biases in models (for instance all models underestimate (overestimate) the intensity of the Arabian Sea (Bay of Bengal) OMZ and is not ideal to understand the sources of discrepancies between the multiple models and hence the uncertainties around future projections. This point needs to be at least discussed. One way to reduce an excessive reliance on MMM is to present the results from individual models whenever possible.

Thank you for the comment. We agree that a discussion of sensitivity to model selection would be useful. The spatial pattern of oxygen trends that we identify in the MMM (oxygenation/deoxygenation features) is not qualitatively sensitive to our model

selection, though models simulate a spread in the amplitude of these features (Figure R1AC1, to be added to SI). However, the analysis of OMZ volume and “contraction/expansion regimes” is obviously influenced by models with strong biases. For example, OMZ core volumes in the Arabian Sea cannot shrink in models that simulate no OMZ core in the first place. It is therefore critical to select models that represent certain historical OMZ features to examine their projections. We propose to take your solution to address this in a more objective way, and exclude models that do not simulate a suboxic (<10umol/kg) volume in the Arabian Sea (Table R1AC1).

Lines 99-101: It would be good to mention other sources of biases such as the representation of the Persian Gulf, the remineralization depth, the ill-represented mesoscale eddy activity, the misrepresented upwelling and productivity in these coarse resolution models.

These are important sources of biases in simulating oxygen in the Arabian Sea and Bay of Bengal, and we propose to add these points to section 3.1: “The overestimation of simulated oxygen values in the Arabian Sea (Fig GAC4b) is likely due primarily to excessive ventilation from marginal seas and southern source waters, though may also be influenced by deficiencies in parameterized oxygen consumption rates and eddy-mixing rates (eg Schmidt et al, 2021). In contrast, ESMs tend to simulate lower than observed oxygen values in the Bay of Bengal (Fig GAC4c), likely because of an overestimation of oxygen consumption rates and remineralization depths (Al Azhar et al., 2017).”

Lines 104-105: Maybe justify the use of a single member instead of the ensemble average (given the importance of forced vs. internal variability)?

The representation of OMZs, or more broadly volume as a function of oxygen, is so different across CMIP-class ESMs that model uncertainty tends to dwarf internal variability (eg Busecke et al. 2022). So, we chose to use only a single member for each model to minimize computational costs (by about an order of magnitude compared to using ensemble averages). Additionally, 7 of 14 models only have one member available with oxygen. We propose to modify this line to justify: “To limit computational costs of this study, and because we expect inter-model variability in dissolved oxygen to dominate over internal variability, only one member is used for each model.”

Line 116: You mean the 85-year trend?

Yes, this should read 85-year (not 75-year). This will be corrected here and elsewhere. Thank you for catching this.

Lines 132-134: Since the OMZ is located below 100m, why include the surface (0-100) layer? I suggest excluding the surface layer in the analysis of O2 classes' volumes. Figure 2: Can you

redo this analysis after excluding the top 100m? Since the OMZ is located in the thermocline, it makes more sense to exclude the surface layer.

By definition, the oxygenated surface layer is excluded from the OMZ volume for sufficiently low oxygen thresholds, as demonstrated in Figure R1AC2. Thus, expliciting excluding the surface does not change the analysis.

Besides, this sort of analysis mixes up the OMZ in the Arabian Sea (AS) and in the Bay of Bengal (BoB). As most models overestimate O<sub>2</sub> in the AS and underestimate it in the BoB, integrating the OMZ volumes across the entire IO can artificially hide those biases as these errors tend to compensate. It would be good to redo the same figure separately for the AS and the BoB. Also Lines 232-233: This is an important difference (and I suspect it is worse in the BoB). It would be good to show these biases in a table while separating the AS and the BoB.

Yes this is a good point. We will add a figure with separate volumes in the AS and BoB (Fig GAC4,6), as well as a discussion in the main text in section 3.1 in order to clarify the interpretation of the model evaluation presented in Figure 2. We also propose to add a supplementary table (Table R1AC1) with separate volume values for the Arabian Sea and Bay of Bengal.

Line 155: Why is only the transport through the Timor passage considered? Why not the total ITF?

We compute transport along 114E along a section connecting Australia and Indonesia. While this section is dominated by the Timor passage, it actually captures transport through the Lombok and Ombai straits as well. For the coarse resolution models used here, this is a good approximation for the total ITF transport. The only other passage to consider in these models that is not captured at 114E is the Sunda strait, which tends to be represented as a single cell open to only 50 m depth, and does not contribute to the transport between 100-1000m. These points will be clarified in the text.

Lines 184-186: Why not take a mean over the last 20 years or so to represent the climatology for the end of the century period instead? justify.

The 'delta' method that we use here (perturbing a historical climatology by a forced linear trend) produces a climatological representation of the end-of-the-century, similar to taking a mean over the last 20 years. A benefit of the delta method is that the trend approximates forced changes at the very end of the time period. In contrast, a mean over the last 20 years may damp the amplitude of the forced signal (one misses the last decade of forced changes).

Line 204: Full stop before "Second".

Thank you.

Line 227: Can you show this analysis for individual models as well? not just the MMM? You can also show individual model based biases in a table for the key classes:  $O_2 < 5$ ,  $O_2 < 20$ ,  $O_2 < 60$ ,  $O_2 < 150$  mmol/m<sup>3</sup>.

Yes, we will add curves for individual models to Figure 2 (see Figure GAC4) and include Table R1AC1 in supplementary information.

Lines 294-295: Why not diagnosing trends in  $O_2$  consumption or remineralization? if the remineralization fluxes are not available, trends in export fluxes at 100 and 500m can be considered. Furthermore, the drivers of  $O_2$  interannual variability may differ from those of long-term  $O_2$  changes. Therefore, I am not fully convinced that the correlation really demonstrates the sources of the long-term oxygenation/deoxygenation. The biology can clearly play a role as models show a robust and important decline in the tropical Indian Ocean productivity by the end of the century. In any case, the two factors (ventilation and respiration) need to be equally explored. Lines 303-304: Same remark. Why is the role of biology not explored or discussed?

We propose to include an analysis of trends in export at 100m as part of an additional results section: *3.7 Contributions of biological sink and stratification changes to oxygen trends* (see Response R1C1).

We agree that the correlation of AOU:age may reflect short-term variability rather than a long term trend, and plan to remove those panels and associated text (Figure 6def, original manuscript).

Lines 311-314: How about the  $O_2$  content of these water masses? a change in the  $O_2$  content of these water masses can nullify those changes in the mixing ratios. This critical point needs to be explored. The ventilation depends both on the circulation/mixing as well as the  $O_2$  content of the water masses (e.g., pre-formed  $O_2$ ). The transport of  $O_2$  needs to be diagnosed.

This is a very good point. We performed the additional analysis of tracking the  $O_2$  transport of these water masses over time, and we find that the basin-scale oxygen supply via the Southern Pathway and ITF declines despite the shifting water mass ratio (Figure R1AC3). Thus, the timeseries of water mass transport ratios in 7b does not demonstrate (as originally argued) that oxygen supply increases on a basin-wide scale. We plan to remove Figure 7b from the main text as it may be misleading. Rather, it is only changes in mixing ratios at more local scales (as discerned by the OMP analysis) that are sufficient to overcome  $O_2$  changes in each source water mass and lead to increased oxygen supply locally.

Lines 329-331: This assumes that these O<sub>2</sub> concentrations remain constant under future climate change, which I am not sure is true.

Yes, we agree that the proper calculation of mixing-driven O<sub>2</sub> changes should account for changes in source water O<sub>2</sub> concentrations between the historical and future climatologies. We propose to add Figure GAC3 to the results sections 3.5 and 3.6. We will add a description of the associated method in section 2.2.4 (See methods at end of General Response). Calculations of mixing-driven O<sub>2</sub> changes yield a wide range of values across models in the ensemble, ranging between about 10 to 40  $\mu\text{mol}/\text{kg}$  change between the historical and end-of-century climatologies in the South Equatorial Current. Similarly, mixing-driven O<sub>2</sub> changes range from about -100 to -25 in the northern Arabian Sea. In both regions, mixing-driven O<sub>2</sub> changes agree well with total O<sub>2</sub> changes, demonstrating that the mixing model can plausibly account for oxygen trends via shifting water mass compositions.

We will remove the back-of-the-envelope calculation in lines 329-331.

Lines 374-379: Need to cite the recent work by Vallivattathillam et al. (2023, *Frontiers in Mar. Sc.*) who also show a robust shrinking of the OMZ in the Arabian Sea based on the analysis of a set of CMIP5 models as well as downscaled regional model simulations. Line 430: I suggest citing two recent studies of the Arabian Sea OMZ that discussed some sources of uncertainties in future model OMZ projections: Vallivattathillam et al. (2023, *Frontiers in Mar. Sci.*) and Lachkar et al., (2023, *Frontiers in Mar. Sci.*). Vallivattathillam et al. (2023) explored the sensitivity of future O<sub>2</sub> projections to model representation of present-day conditions and highlighted the importance of correcting biases in global models representation of present-day OMZs. This appears to considerably reduce the discrepancies among models and makes the OMZ shrinking signal emerge more robustly. Lachkar et al (2023) discussed a few factors (e.g., timescales of the different mechanisms) that may explain the difference between recent trends dominated by deoxygenation in the AS and the projected future changes dominated by oxygenation.

Yes, we agree that these works are very relevant to our study. We propose to expand our discussion of Arabian Sea projections (lines 442-450 in submitted manuscript) as follows:

“Deoxygenation in the northern Arabian Sea has been detected in observations (reviewed by Lachkar et al., 2023). The rapid heating of marginal seas compared to the open ocean and the subsequent increase in stratification and buoyancy of the marginal sea outflows, particularly for the Persian Gulf is also supported by observations (Al-Yamani et al., 2017; Naqvi, 2021). The projected changes in outflow ventilation are consistent with the findings of ocean model simulation studies, which showed that the warming and shoaling of the Persian Gulf was a major driver of the deoxygenation in



the northern Arabian Sea (Lachkar et al., 2019, 2021). Yet, ESMs tend to overestimate the oxygen transport by these marginal sea outflows to the Arabian Sea (e.g. Schmidt et al., 2021). This partially explains the systematic high oxygen bias in the Arabian Sea in the ensemble of eight CMIP6 ESMs used in this study (Fig. 1), the absence of a suboxia in the five ESMs that were excluded from the ensemble (Table R1AC1), and could influence the magnitude of the projected deoxygenation associated with the vertical displacement of these outflows. In fact, a study by Vallivattathillam et al. (2023), which applies downscaling methods to CMIP5 projections of Arabian Sea oxygen under the high emission RCP8.5 forcing, finds that deoxygenation in the region simulated in CMIP5 models is not preserved after a bias-corrected downscaling method is applied (sampling between 200 and 700 m). This suggests that ESM simulated mean state biases in the Arabian Sea can have a profound impact on projected changes.

There are also aspects of the Arabian Sea which may limit the accuracy of the mixing model (Optimum Multiparameter; OMP) analysis employed in this study. Specifically, it may be difficult to distinguish the contribution of Persian Gulf Water compared to Arabian Sea surface water because both tend to be anomalously warm, saline and well oxygenated. Thus, it is possible that weakened vertical exchange with the surface is aliased as a decrease in Persian Gulf Water fraction. The presence of Northern Arabian Sea deoxygenation in MIROC-ES2L, an ESM which does not resolve the marginal seas and was thus excluded from the OMP analysis for the region, also suggests that stratification increases may play a first-order role in Northern Arabian Sea deoxygenation in the ESM ensemble. A previous study by Lachkar et al. (2021), which investigates deoxygenation in the Arabian Sea from 1982 to 2010 using a high-resolution regional ocean model, attributes about 75% of ventilation decreases over this period to vertical mixing changes and only 25% to advective changes. In contrast, Vallivattathillam et al. (2023) demonstrate that remote physical forcing (including marginal seas) drives deoxygenation below 200 m in the northern Arabian Sea while local forcing (including stratification from local warming) does not in downscaled projections under RCP8.5 forcing.

Further work, including for example a full oxygen budget analysis, would be required to better disambiguate the effects of marginal sea shoaling and increased stratification in the projections of Arabian Sea oxygen for the ESMs used in this study; however, data for such a study are not currently available. Based on these considerations, the relative effects of marginal sea shoaling and increased stratification in ESM projections of the northern Arabian Sea remain largely uncertain. Ultimately though, the present study supports the conclusions of the recent review by Lachkar et al. (2023): the Arabian Sea OMZ will be reshaped by changes in stratification and the Persian Gulf outflow driving deoxygenation in the northern subsurface layer, while increased ventilation from the south drives oxygenation of the deeper layers.”

Fig S1: Maybe show the difference model-minus-obs to better visualize individual model biases.

Yes, this is helpful for visualizing individual model biases (see Figure R1AC4). We will include it in supplementary information to accompany Figure S2 (original manuscript).

Fig S5: You mean Figure 1 in the main paper?

Yes, thank you for catching this.

Fig S6: Are these trends vertically averaged as stated in the caption, or are they trends in the vertically averaged O2 concentrations?

Figure S6 shows the trends vertically averaged, as stated in the caption. We first calculate a 3D field of oxygen trends for each model regridded to a rectilinear 1x1 degree grid, then take a vertical average. Performing operations in this order allows for a direct comparison between maps as in Figure S6 and sections as in Figure S7.

The remaining specific comments of Reviewer 1 are all referring to main concern #2 in the general response (definition of OMZ). Please refer to our General Response point 2, and to Response R1C3.

Lines 9-10: Is O2 at 180 considered part of the OMZ?

Lines 132-138: It is not clear which OMZ definition this paper uses. OMZs are traditionally connected to hypoxia, but some thresholds used here (150 mmol/m<sup>3</sup>) are way above hypoxia, and result in nearly  $\frac{2}{3}$  of the Indian Ocean being filled with OMZ waters (down to 20S). This is very unusual as the Indian Ocean OMZs are traditionally restricted to the Arabian Sea and the Bay of Bengal in the northern Indian Ocean. It is true that some previous studies suggested that some commercial fish species can be stressed at O2 levels around 150 or below. However, all these works are based on studies of the Atlantic and Pacific Oceans and hence may not necessarily be relevant to the Indian Ocean species. The use of this threshold in the Indian Ocean needs to be justified and its implications discussed.

Figure 3: This should not be titled “OMZ volume changes” since O2 thresholds as high as 200 and above are used. You are sampling the entire upper ocean (0-1000m) not just the OMZ. Indeed, a significant portion of the analysis is dedicated to relatively well oxygenated waters, well above hypoxia. Therefore, I suggest rephrasing the presentation to make it clearer that O2 changes in the entire upper ocean are analyzed and not just the OMZ.

Lines 235-236: Given the very high threshold (180 mmol/m<sup>3</sup>), can one still refer to this as a part of the OMZ? This is likely in the surface layer and I suspect is essentially driven by solubility. Please rephrase.

Lines 239-245: Maybe refer to the different classes of O<sub>2</sub> as O<sub>2</sub><20, O<sub>2</sub><60, O<sub>2</sub><150,...instead of OMZ20, OMZ60, and OMZ150.

Figure 11: Again, can we talk about OMZ when O<sub>2</sub> concentration is close to saturation (for O<sub>2</sub> close to 200 mmol/m<sup>3</sup>)? This essentially shows the cumulative changes in O<sub>2</sub> frequency distribution.

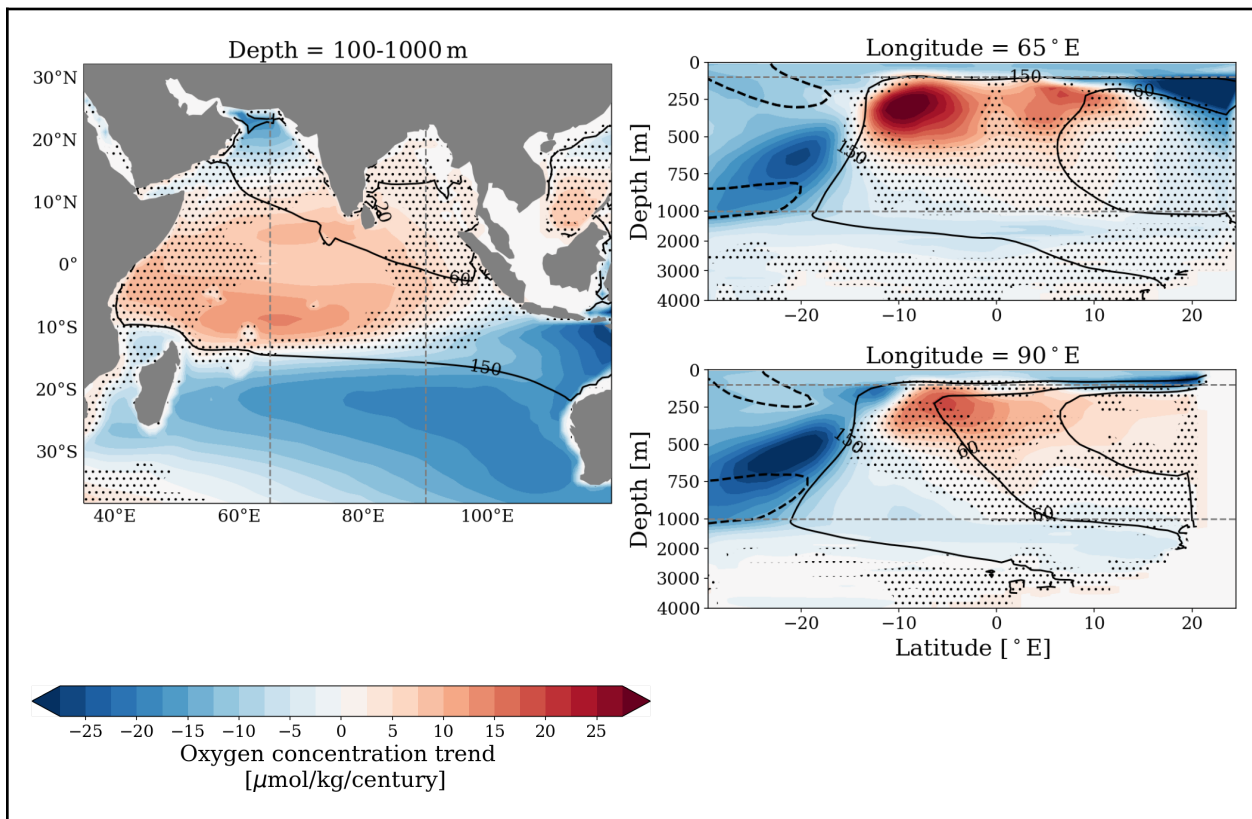

Figure R1AC1: Recreation of dissolved oxygen trends in Figure 4 using all 14 available ESMs. Multi-model mean (MMM) dissolved oxygen trends under SSP5-8.5 scenario forcing (1915-2100). Dissolved oxygen trends (a) between 100 and 1000m, (b) at 65°E and (c) at 90°E. Dashed gray lines mark (a) 65°E and 90°E, and (b,c) 100 and 1000m. (b,c) Solid black contours represent 20, 60 and 150  $\mu\text{mol/kg}$  oxygen.

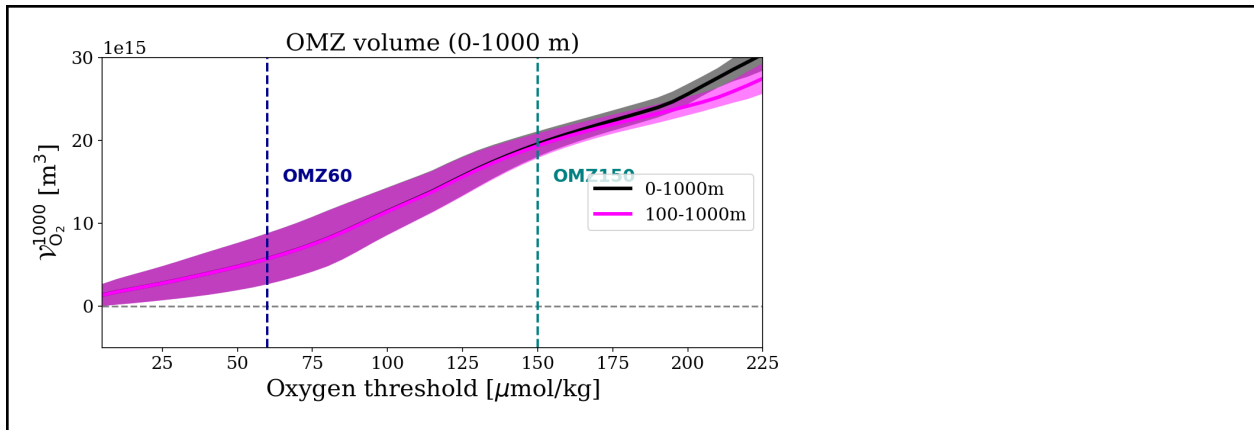

Figure R1AC2: Upper ocean OMZ volume as a function of oxygen threshold including and excluding upper 100 m.

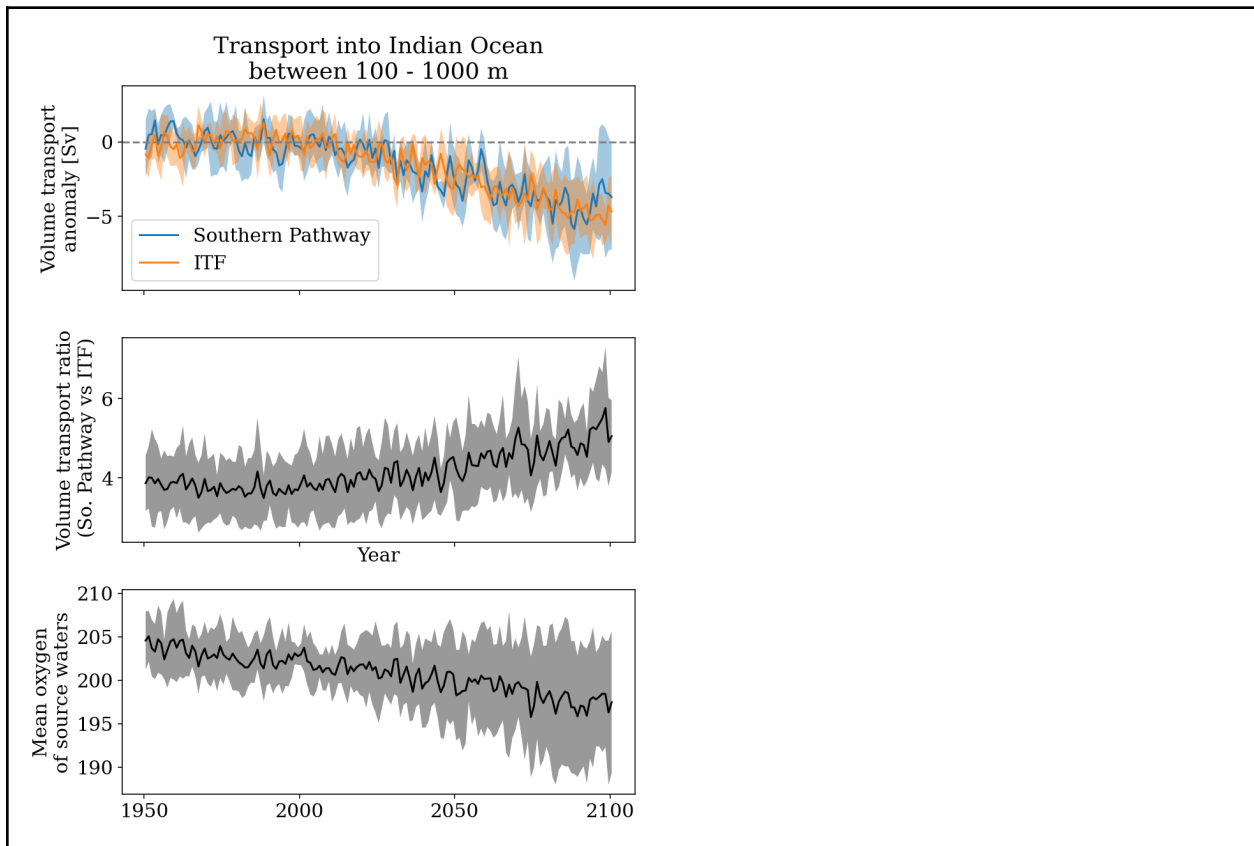

Figure R1AC3: Interannual transport anomalies (referenced to 1950-2015 mean) for inflowing components of Southern Pathway Waters (blue) and Indonesian Throughflow Water (orange) between 100 and 1000 m. (b) Ratio of total inflowing transport of Southern Pathway and Indonesian Throughflow Waters. (c) Mean oxygen concentration of combined Southern Pathway and Indonesian Throughflow waters.

Solid curves represent multi-model mean (MMM) and shading represents one standard deviation of model spread. Transport data is available for 5 ESMs.

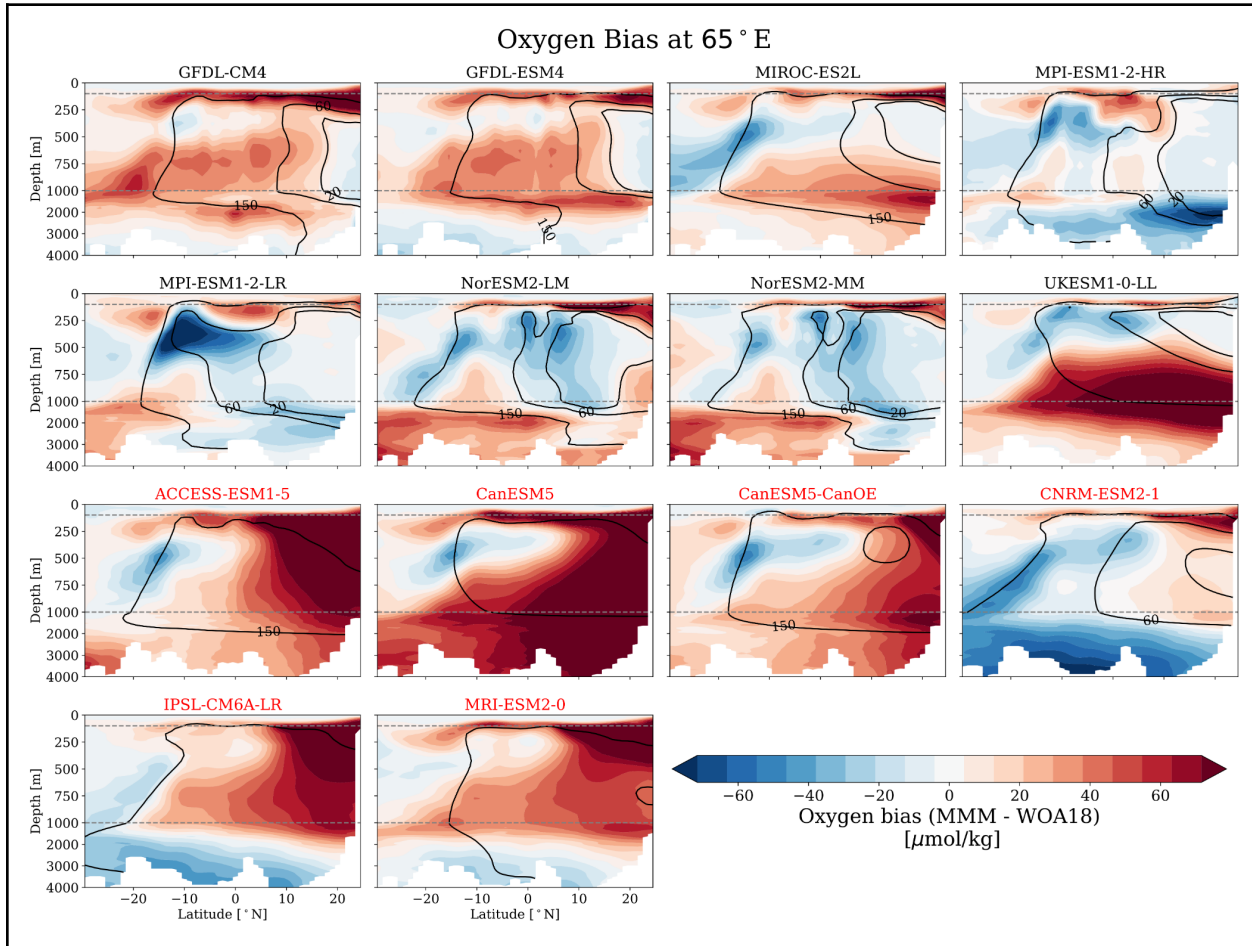

Figure R1AC4: Oxygen bias relative to World Ocean Atlas at 65E. ESM names in red are not included in the selected ensemble.

|    | model         | 10 (AS) | 20 (AS) | 20 (BB) | 60   | 150   |
|----|---------------|---------|---------|---------|------|-------|
| 0  | WOA           | 0.2     | 2.1     | 0.6     | 11.4 | 62.9  |
| 1  | GFDL-CM4      | 0.4     | 0.7     | 1.5     | 7.1  | 43.2  |
| 2  | GFDL-ESM4     | 0.4     | 0.7     | 1.6     | 5.9  | 47.1  |
| 3  | MIROC-ES2L    | 0.5     | 0.8     | 1.1     | 5.9  | 39.4  |
| 4  | MPI-ESM1-2-HR | 2.0     | 3.0     | 3.8     | 18.3 | 73.5  |
| 5  | MPI-ESM1-2-LR | 2.7     | 3.9     | 3.0     | 16.7 | 54.2  |
| 6  | NorESM2-LM    | 1.7     | 2.4     | 3.2     | 13.7 | 42.0  |
| 7  | NorESM2-MM    | 2.5     | 3.3     | 3.2     | 14.8 | 43.6  |
| 8  | UKESM1-0-LL   | 0.3     | 0.6     | 0.7     | 4.4  | 18.3  |
| 9  | ACCESS-ESM1-5 | 0.0     | 0.0     | 0.4     | 2.8  | 40.5  |
| 10 | CanESM5       | 0.0     | 0.0     | 0.4     | 1.6  | 19.9  |
| 11 | CanESM5-CanOE | 0.0     | 0.0     | 0.9     | 4.1  | 35.8  |
| 12 | CNRM-ESM2-1   | 0.0     | 0.5     | 1.7     | 13.3 | 114.9 |
| 13 | IPSL-CM6A-LR  | 0.0     | 0.0     | 0.1     | 0.7  | 105.7 |
| 14 | MRI-ESM2-0    | 0.0     | 0.0     | 1.3     | 3.9  | 60.5  |

Table R1AC1: OMZ volumes (in  $10^{15}\text{m}^3$ ) for World Ocean Atlas (WOA) and CMIP6 ESMs at thresholds of 10, 20, 60 150  $\mu\text{mol}/\text{kg}$ . Volume for thresholds of 10 and 20  $\mu\text{mol}/\text{kg}$  are separated as Arabian Sea (AS) and Bay of Bengal (BoB). Southern extent of AS and BoB domains are taken at 5N.
